# Supplementary material for: Free-standing and bridged amine-functionalized periodic mesoporous organosilica films
Source: Royal Society of Chemistry journal article supplement (doi:10.1039/c0jm01278e), 2010-01-01
Supplement: c0jm01278e.pdf [file c0jm01278e.pdf]

## Electronic Supplementary Information

### Free-standing and bridged-amine functionalized periodic mesoporous organosilica films

Sung Soo Park,<sup>a</sup> Jeong Hun Shin<sup>a</sup>, Dongyuan Zhao,<sup>b</sup> and Chang-Sik Ha<sup>\*a</sup>

<sup>a</sup>*Department of Polymer Science and Engineering, Pusan National University,  
Geumjeong-gu, Busan 609-735, Korea,*

<sup>b</sup>*Department of Chemistry, Advanced Materials Laboratory, Fudan University Shanghai  
200433, P. R. China*

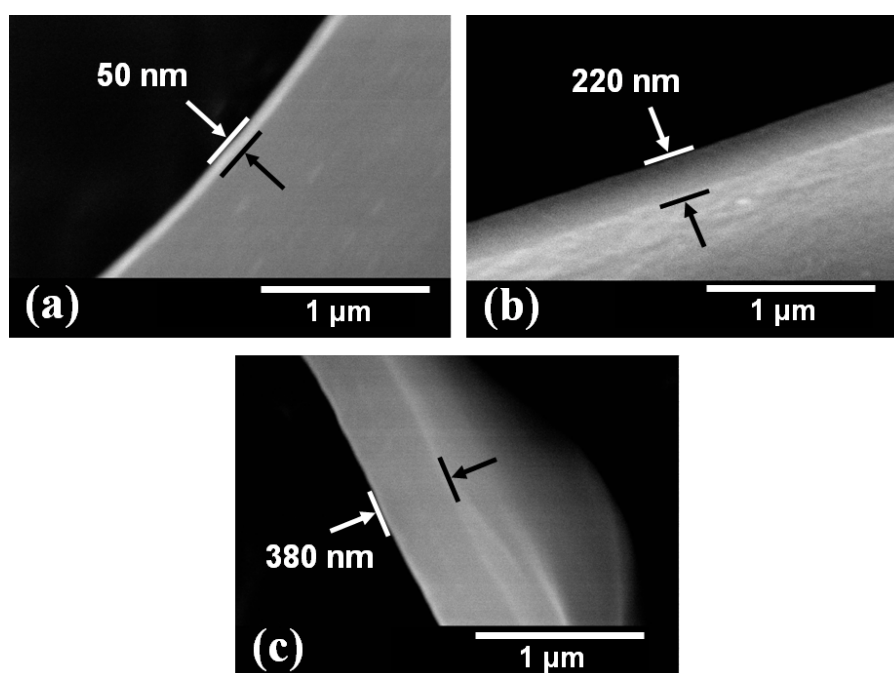

**Fig. S1** SEM images of the magnified edge part of the as-synthesized free-standing BAF-PMO films grown at the air-water interface at 95 °C for (a) 2.5 h, (b) 24 h, and 48 h with the reaction mixture of 1.0 BTEE : 0.05 BTMSPA : 0.57 C<sub>16</sub>TABr : 2.28 NaOH : 336 H<sub>2</sub>O.

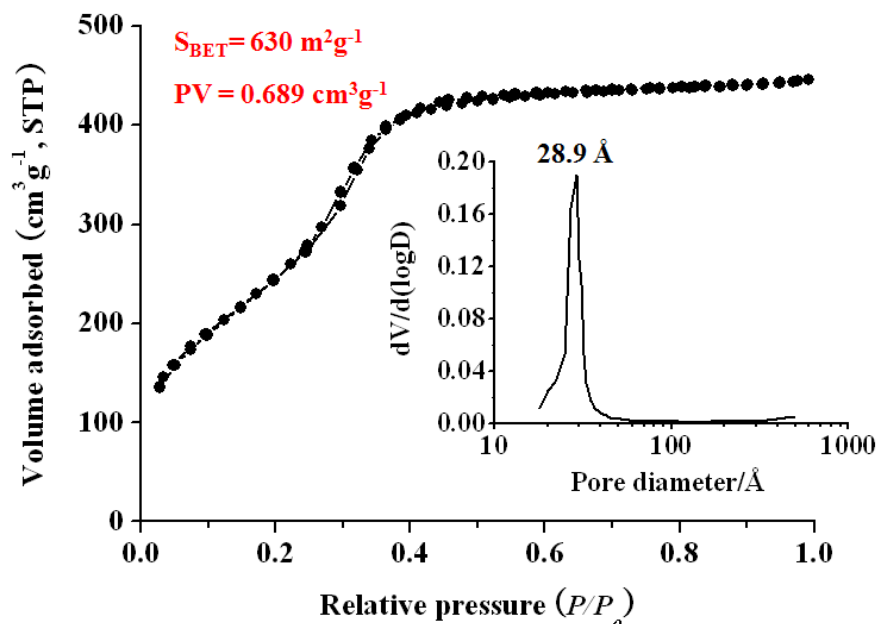

**Fig. S2** Nitrogen adsorption–desorption isotherms for the surfactant–extracted BAF–PMO film synthesized at 95 °C for 8 h with the reaction mixture of 1.0 BTEE : 0.05 BTMSPA : 0.57 C<sub>16</sub>TABr : 2.28 NaOH : 336 H<sub>2</sub>O. Inset shows the pore size distribution obtained using adsorption branch by BJH method. S<sub>BET</sub> and PV denote the specific surface area that was obtained from the adsorption branch of the isotherm by employing the Brunauer–Emmett–Teller (BET) method and the pore volume, respectively.

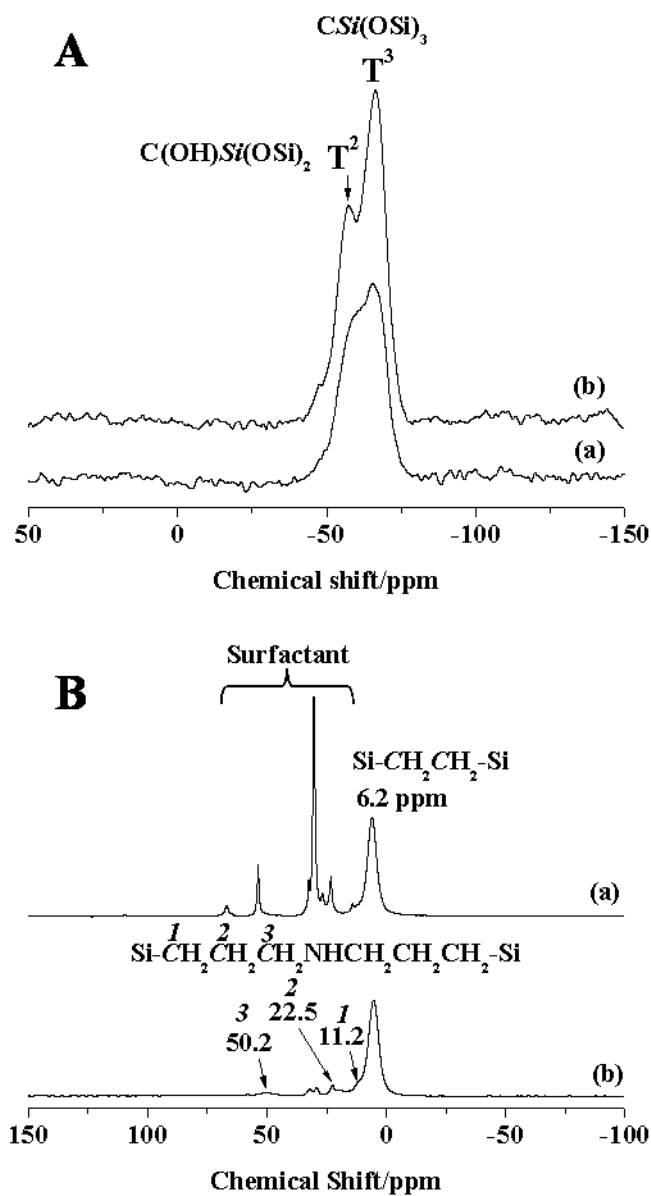

**Fig. S3**  $^{29}Si$  MAS NMR spectra of A(a) the as-synthesized BAF-PMO film, A(b) surfactant-extracted BAF-PMO film and B(a)  $^{13}C$  cross-polarization (CP) MAS NMR spectrum of as-synthesized BAF-PMO film, B(b) surfactant-extracted BAF-PMO film.
